# Supplementary material for: Effect of Early and Late Interventions with Dietary Oils on Vascular and Neural Complications in a Type 2 Diabetic Rat Model
Source: Hindawi journal article supplement (doi:10.1155/2019/5020465), 2019-08-07
Supplement: f1 [file 5020465.f1.pdf]

Supplemental Table 1: Fatty Acid % Composition of Diets

| Diet                    | 16:0       | 18:0       | 18:1       | 18:2       | 18:3 (n-6) | 18:3 (n-3) | 20:5      | 22:6      |
|-------------------------|------------|------------|------------|------------|------------|------------|-----------|-----------|
| Control                 | 21 ± 3.0   | 7.3 ± 1.2  | 30.4 ± 4.0 | 31.7 ± 5.1 | 2.8 ± 0.6  | < 1        | < 1       | < 1       |
| High Fat                | 16.8 ± 2.2 | 10.8 ± 1.3 | 41.2 ± 5.6 | 26.9 ± 2.8 | 2.3 ± 0.3  | < 1        | < 1       | < 1       |
| Olive oil               | 14.9 ± 2.4 | 5.4 ± 0.7  | 49.7 ± 6.3 | 21.3 ± 3.0 | 2.0 ± 0.1  | < 1        | < 1       | < 1       |
| Safflower oil           | 12.3 ± 0.7 | 6.0 ± 0.5  | 24.9 ± 3.4 | 54.3 ± 4.3 | < 1        | < 1        | < 1       | < 1       |
| Evening Primrose<br>oil | 11.6 ± 1.7 | 6.0 ± 0.7  | 20.7 ± 2.4 | 52.5 ± 4.0 | 5.4 ± 0.8  | < 1        | < 1       | < 1       |
| Flaxseed oil            | 11.1 ± 1.0 | 6.2 ± 1.0  | 27.0 ± 2.8 | 23.6 ± 3.4 | < 1        | 31.0 ± 3.3 | < 1       | < 1       |
| Menhaden oil            | 18.7 ± 0.9 | 7.1 ± 0.6  | 22.6 ± 2.6 | 16.0 ± 0.9 | < 1        | 2.0 ± 0.1  | 9.5 ± 1.0 | 6.9 ± 0.4 |

Data are presented as the mean of three determinations ± S.E.M.

Supplemental Table 2: Effect of Dietary Lipids on Fatty Acid % Composition of Serum Measured by Gas-liquid Chromatography Following Early Intervention

| Condition                           | 16:0       | 18:0                    | 18:1                      | 18:2                      | 18:3 (n-6)               | 18: 3 (n-3)              | 20:4                      | 20:5                     | 22:6                     |
|-------------------------------------|------------|-------------------------|---------------------------|---------------------------|--------------------------|--------------------------|---------------------------|--------------------------|--------------------------|
| Control (3)                         | 20.7 ± 0.4 | 18.4 ± 0.4              | 11.0 ± 0.4                | 19.6 ± 0.8                | 0.2 ± 0.1                | 0.1 ± 0.1                | 20.6 ± 0.8                | 0.7 ± 0.1                | 2.9 ± 0.3                |
| Diabetic (3)                        | 19.9 ± 0.6 | 13.5 ± 0.7 <sup>a</sup> | 9.5 ± 0.7                 | 20.3 ± 0.9                | 0.2 ± 0.1                | 0.1 ± 0.1                | 20.2 ± 1.4                | 0.5 ± 0.1                | 4.1 ± 0.1                |
| Diabetic + Olive oil (3)            | 21.0 ± 1.6 | 20.6 ± 1.1              | 16.1 ± 1.5 <sup>a,b</sup> | 19.6 ± 2.0                | 0.2 ± 0.1                | 0.2 ± 0.1                | 15.4 ± 1.2                | 0.4 ± 0.1                | 4.6 ± 0.6                |
| Diabetic + Safflower oil (3)        | 19.1 ± 0.7 | 17.4 ± 0.8              | 8.0 ± 0.3                 | 28.2 ± 1.2 <sup>a,b</sup> | 0.2 ± 0.1                | 0.2 ± 0.1                | 18.5 ± 1.0                | 0.3 ± 0.1                | 3.7 ± 0.3                |
| Diabetic + Evening Primrose oil (3) | 18.5 ± 0.5 | 20.8 ± 0.3              | 7.6 ± 0.3                 | 22.6 ± 1.0                | 1.4 ± 0.2 <sup>a,b</sup> | 0.2 ± 0.1                | 18.6 ± 1.8                | 0.4 ± 0.1                | 2.6 ± 0.4                |
| Diabetic + Flaxseed oil (3)         | 17.7 ± 1.0 | 16.8 ± 0.4              | 9.9 ± 0.4                 | 25.1 ± 2.0                | 0.3 ± 0.1                | 4.5 ± 0.2 <sup>a,b</sup> | 11.2 ± 0.5 <sup>a,b</sup> | 1.9 ± 0.1 <sup>a,b</sup> | 5.2 ± 0.6 <sup>a</sup>   |
| Diabetic + Menhaden oil (3)         | 21.8 ± 0.5 | 15.0 ± 1.0              | 7.8 ± 1.1                 | 18.7 ± 1.1                | 0.2 ± 0.1                | 0.4 ± 0.1                | 12.2 ± 1.3 <sup>a,b</sup> | 7.8 ± 0.3 <sup>a,b</sup> | 8.8 ± 0.9 <sup>a,b</sup> |

Data are presented as the mean ± S.E.M. a P < 0.05 compared to control rats; b P < 0.05 compared to diabetic rats. The number of animals in each group is shown in parenthesis.

Supplemental Table 3: Effect of Dietary Lipids on Fatty Acid % Composition of Serum Measured by Gas-liquid Chromatography Following Late Intervention

| Condition                           | 16:0       | 18:0       | 18:1       | 18:2       | 18:3 (n-6) | 18: 3 (n-3)              | 20:4                     | 20:5                     | 22:6                     |
|-------------------------------------|------------|------------|------------|------------|------------|--------------------------|--------------------------|--------------------------|--------------------------|
| Control (3)                         | 21.2± 0.4  | 15.9 ± 0.6 | 9.4 ± 0.3  | 17.3 ± 1.2 | 0.2 ± 0.1  | 0.1 ± 0.1                | 14.6 ± 2.0               | 0.7 ± 0.1                | 3.6 ± 0.1                |
| Diabetic (3)                        | 19.7 ± 1.8 | 19.5 ± 1.1 | 10.6 ± 0.5 | 18.3 ± 2.1 | 0.3 ± 0.1  | 0.1 ± 0.1                | 16.6 ± 2.1               | 0.5 ± 0.1                | 3.9 ± 0.8                |
| Diabetic + Olive oil (3)            | 18.9 ± 1.2 | 19.1 ± 1.5 | 12.8 ± 1.4 | 15.6 ± 1.4 | 0.2 ± 0.1  | 0.3 ± 0.1                | 17.9 ± 2.2               | 0.4 ± 0.1                | 4.1 ± 0.6                |
| Diabetic + Safflower oil (3)        | 19.1 ± 0.5 | 20.4 ± 1.8 | 6.0 ± 1.1  | 23.9 ± 1.1 | 0.3 ± 0.1  | 0.2 ± 0.1                | 18.3 ± 1.6               | 0.3 ± 0.1                | 3.8 ± 0.4                |
| Diabetic + Evening Primrose oil (3) | 19.9 ± 1.0 | 20.3 ± 1.0 | 5.8 ± 1.0  | 24.6 ± 1.4 | 0.7 ± 0.1  | 0.2 ± 0.1                | 19.6 ± 1.4               | 0.4 ± 0.1                | 3.3 ± 0.7                |
| Diabetic + Flaxseed oil (3)         | 17.5 ± 0.8 | 21.8 ± 1.2 | 6.9 ± 1.7  | 21.8 ± 1.4 | 0.2 ± 0.1  | 5.2 ± 1.5 <sup>a,b</sup> | 13.2 ± 1.6               | 1.5 ± 0.1 <sup>a,b</sup> | 4.2 ± 0.2                |
| Diabetic + Menhaden oil (3)         | 23.4 ± 0.5 | 15.0 ± 1.2 | 10.5 ± 1.3 | 19.5 ± 0.8 | ND         | 0.7 ± 0.1                | 8.0 ± 0.4 <sup>a,b</sup> | 7.4 ± 0.2 <sup>a,b</sup> | 7.6 ± 0.5 <sup>a,b</sup> |

Data are presented as the mean ± S.E.M. ND: not detected. a P < 0.05 compared to control rats; b P < 0.05 compared to diabetic rats. The number of animals in each group is shown in parenthesis.

Supplemental Table 4: Effect of Dietary Lipids on Fatty Acid % Composition of Liver Measured by Gas-liquid Chromatography Following Early Intervention

| Condition                           | 16:0       | 18:0                    | 18:1                    | 18:2                    | 18:3 (n-6) | 18:3 (n-3)               | 20:4                      | 20:5                   | 22:6                      |
|-------------------------------------|------------|-------------------------|-------------------------|-------------------------|------------|--------------------------|---------------------------|------------------------|---------------------------|
| Control (3)                         | 18.6 ± 1.7 | 13.6 ± 1.7              | 8.5 ± 0.2               | 10.5 ± 1.1              | 0.8 ± 0.3  | 0.1 ± 0.1                | 18.8 ± 2.0                | 1.7 ± 0.4              | 6.5 ± 0.4                 |
| Diabetic (3)                        | 16.3 ± 1.6 | 18.9 ± 2.1              | 10.8 ± 1.6              | 12.0 ± 1.2              | 1.2 ± 0.1  | 0.2 ± 0.1                | 17.4 ± 0.4                | 2.1 ± 1.0              | 6.7 ± 0.3                 |
| Diabetic + Olive oil (3)            | 16.4 ± 0.2 | 20.8 ± 1.7 <sup>a</sup> | 13.7 ± 1.9 <sup>a</sup> | 13.3 ± 1.7              | 0.7 ± 0.1  | 0.3 ± 0.1                | 19.0 ± 1.4                | 1.1 ± 0.4              | 6.7 ± 0.3                 |
| Diabetic + Safflower oil (3)        | 15.9 ± 1.1 | 20.9 ± 0.7 <sup>a</sup> | 7.3 ± 0.8               | 20.1 ± 2.5 <sup>a</sup> | 0.9 ± 0.1  | 0.3 ± 0.1                | 19.3 ± 0.3                | 1.0 ± 0.3              | 6.5 ± 0.5                 |
| Diabetic + Evening Primrose oil (3) | 15.4 ± 1.1 | 22.8 ± 0.7              | 5.2 ± 0.3 <sup>b</sup>  | 16.1 ± 2.5              | 1.2 ± 0.1  | 0.2 ± 0.2                | 21.2 ± 1.1                | 0.9 ± 0.6              | 5.3 ± 0.3                 |
| Diabetic + Flaxseed oil (3)         | 14.5 ± 1.1 | 19.6 ± 1.0              | 9.0 ± 0.6               | 17.3 ± 2.3              | 0.4 ± 0.1  | 4.4 ± 0.5 <sup>a,b</sup> | 14.3 ± 0.7                | 3.1 ± 0.4              | 6.2 ± 1.2                 |
| Diabetic + Menhaden oil (3)         | 20.0 ± 0.4 | 20.5 ± 1.7              | 7.7 ± 0.7               | 13.5 ± 1.0              | 0.3 ± 0.1  | 0.2 ± 0.1                | 12.1 ± 0.7 <sup>a,b</sup> | 4.8 ± 0.6 <sup>a</sup> | 14.4 ± 0.2 <sup>a,b</sup> |

Data are presented as the mean ± S.E.M. a P < 0.05 compared to control rats; b P < 0.05 compared to diabetic rats. The number of animals in each group is shown in parenthesis.

Supplemental Table 5: Effect of Dietary Lipids on Fatty Acid % Composition of Liver Measured by Gas-liquid Chromatography Following Late Intervention

| Condition                           | 16:0       | 18:0       | 18:1                     | 18:2                      | 18:3 (n-6) | 18:3 (n-3)               | 20:4                      | 20:5                     | 22:6                      |
|-------------------------------------|------------|------------|--------------------------|---------------------------|------------|--------------------------|---------------------------|--------------------------|---------------------------|
| Control (3)                         | 21.3 ± 2.8 | 17.0 ± 2.4 | 9.2 ± 0.7                | 12.2 ± 0.2                | 0.4 ± 0.1  | 0.2 ± 0.1                | 20.3 ± 0.8                | 0.7 ± 0.1                | 5.2 ± 0.6                 |
| Diabetic (3)                        | 18.7 ± 0.7 | 20.3 ± 0.2 | 12.1 ± 0.4 <sup>a</sup>  | 14.5 ± 1.4                | 0.3 ± 0.1  | 0.1 ± 0.1                | 20.0 ± 0.7                | 0.7 ± 0.1                | 6.9 ± 1.3                 |
| Diabetic + Olive oil (3)            | 15.0 ± 0.9 | 17.2 ± 1.1 | 11.1 ± 1.0               | 9.6 ± 0.9                 | 0.2 ± 0.1  | 0.2 ± 0.1                | 18.7 ± 1.0                | 1.0 ± 0.1                | 7.8 ± 0.6                 |
| Diabetic + Safflower oil (3)        | 19.0 ± 1.7 | 19.7 ± 2.3 | 7.7 ± 0.3 <sup>b</sup>   | 20.2 ± 1.6 <sup>a,b</sup> | 0.4 ± 0.1  | 0.3 ± 0.1                | 18.0 ± 1.2                | 0.5 ± 0.2                | 6.6 ± 0.5                 |
| Diabetic + Evening Primrose oil (3) | 16.4 ± 0.8 | 19.8 ± 1.4 | 7.0 ± 0.3 <sup>b</sup>   | 18.3 ± 1.2 <sup>a</sup>   | 0.3 ± 0.1  | 0.4 ± 0.2                | 20.7 ± 0.2                | 0.8 ± 0.1                | 6.0 ± 1.1                 |
| Diabetic + Flaxseed oil (3)         | 17.8 ± 0.2 | 24.1 ± 1.0 | 5.6 ± 0.4 <sup>a,b</sup> | 17.9 ± 0.2 <sup>a</sup>   | 0.3 ± 0.1  | 3.8 ± 0.6 <sup>a,b</sup> | 16.0 ± 0.5 <sup>a,b</sup> | 2.4 ± 0.1 <sup>a,b</sup> | 7.7 ± 0.1                 |
| Diabetic + Menhaden oil (3)         | 20.5 ± 1.4 | 16.1 ± 0.6 | 9.5 ± 0.7                | 14.4 ± 1.4                | 0.4 ± 0.1  | 0.5 ± 0.1                | 10.0 ± 0.2 <sup>a,b</sup> | 5.9 ± 0.6 <sup>a,b</sup> | 13.7 ± 0.9 <sup>a,b</sup> |

Data are presented as the mean ± S.E.M. a P < 0.05 compared to control rats; b P < 0.05 compared to diabetic rats. The number of animals in each group is shown in parenthesis.

Supplemental Table 6: Fatty Acid Unsaturation Indices of Serum and Liver Following Early Intervention

| Condition                       | Serum                    | Liver                      |
|---------------------------------|--------------------------|----------------------------|
| Control                         | 1.69 ± 0.02              | 1.74 ± 0.03                |
| Diabetic                        | 1.63 ± 0.04              | 1.78 ± 0.07                |
| Diabetic + Olive oil            | 1.50 ± 0.06              | 1.73 ± 0.05                |
| Diabetic + Safflower oil        | 1.54 ± 0.02              | 1.77 ± 0.04                |
| Diabetic + Evening Primrose oil | 1.54 ± 0.06              | 1.77 ± 0.05                |
| Diabetic + Flaxseed oil         | 1.62 ± 0.05              | 1.78 ± 0.09                |
| Diabetic + Menhaden oil         | 1.89 ± 0.04 <sup>b</sup> | 2.07 ± 0.01 <sup>a,b</sup> |

Data are presented as the mean ± S.E.M. a P < 0.05 compared to control rats; b P < 0.05 compared to diabetic rats.

Supplemental Table 7: Fatty Acid Unsaturation Indices of Serum and Liver Following Late Intervention

| Condition                       | Serum                    | Liver                      |
|---------------------------------|--------------------------|----------------------------|
| Control                         | 1.67 ± 0.05              | 1.60 ± 0.03                |
| Diabetic                        | 1.52 ± 0.06              | 1.76 ± 0.04                |
| Diabetic + Olive oil            | 1.60 ± 0.03              | 1.76 ± 0.03                |
| Diabetic + Safflower oil        | 1.59 ± 0.02              | 1.73 ± 0.05                |
| Diabetic + Evening Primrose oil | 1.60 ± 0.04              | 1.75 ± 0.05                |
| Diabetic + Flaxseed oil         | 1.62 ± 0.03              | 1.87 ± 0.01 <sup>a</sup>   |
| Diabetic + Menhaden oil         | 1.75 ± 0.04 <sup>b</sup> | 2.03 ± 0.03 <sup>a,b</sup> |

Data are presented as the mean ± S.E.M. a P < 0.05 compared to control rats; b P < 0.05 compared to diabetic rats.

Supplemental Table 8: Ratio of n-6 to n-3 Fatty Acids of Liver and Serum Measured by Gas-liquid Chromatography Following Early Intervention

| Condition                       | Serum                    | Liver                    |
|---------------------------------|--------------------------|--------------------------|
| Control                         | 7.3 ± 0.4                | 3.6 ± 0.6                |
| Diabetic                        | 7.8 ± 1.0                | 3.4 ± 0.6                |
| Diabetic + Olive oil            | 7.0 ± 0.7                | 4.1 ± 0.4                |
| Diabetic + Safflower oil        | 9.7 ± 1.1                | 5.0 ± 0.7                |
| Diabetic + Evening Primrose oil | 11.5 ± 1.6               | 6.6 ± 0.5                |
| Diabetic + Flaxseed oil         | 3.2 ± 0.4 <sup>a</sup>   | 2.3 ± 0.1                |
| Diabetic + Menhaden oil         | 1.8 ± 0.2 <sup>a,b</sup> | 1.3 ± 0.1 <sup>a,b</sup> |

Data are presented as the mean ± S.E.M. a p < 0.05 compared to control rats; b p < 0.05 compared to diabetic rats.



Supplemental Table 9: Ratio of n-6 to n-3 Fatty Acids of Liver and Serum Measured by Gas-liquid Chromatography Following Late Intervention

| Condition                       | Serum                    | Liver                    |
|---------------------------------|--------------------------|--------------------------|
| Control                         | 9.1 ± 0.6                | 5.2 ± 1.0                |
| Diabetic                        | 8.4 ± 1.4                | 5.2 ± 1.0                |
| Diabetic + Olive oil            | 7.7 ± 0.7                | 2.9 ± 0.4                |
| Diabetic + Safflower oil        | 10.6 ± 1.3               | 5.3 ± 0.4                |
| Diabetic + Evening Primrose oil | 12.9 ± 2.2               | 5.9 ± 0.7                |
| Diabetic + Flaxseed oil         | 3.4 ± 0.7 <sup>a</sup>   | 2.4 ± 0.1                |
| Diabetic + Menhaden oil         | 1.8 ± 0.1 <sup>a,b</sup> | 1.2 ± 0.1 <sup>a,b</sup> |

Data are presented as the mean ± S.E.M. a p < 0.05 compared to control rats; b p < 0.05 compared to diabetic rats.

Supplemental Figure 1

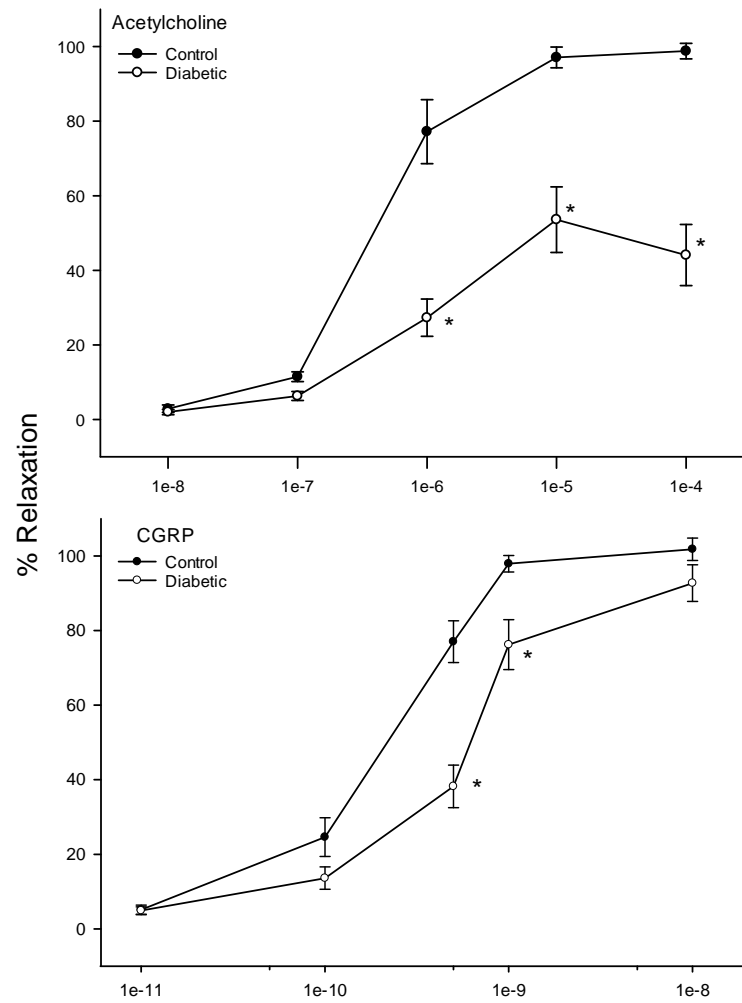

Vascular relaxation to acetylcholine (top) and calcitonin gene-related peptide (bottom) in epineurial arterioles of the sciatic nerve at the time of early intervention in high fat fed diabetic Sprague-Dawley rats;  $p < 0.05$  compared to control rats.
